# Supplementary material for: Fighting while Parasitized: Can Nematode Infections Affect the Outcome of Staged Combat in Beetles?
Source: PLoS One. 2015 Apr 1;10(4):e0121614. doi: 10.1371/journal.pone.0121614 (PMC4382113; doi:10.1371/journal.pone.0121614)
Supplement: S1 Data — (XLSX) [file pone.0121614.s001.xlsx]

## Sheet: Main Data
Pair #	Beetle ID	Beetle_Color	Weight	Sex	Nematode Score	Infection (0/1)	Pair Infection Status	Ave_Fight_Aggression	%Wins	TransformedWins	FightWinner	Win Status
1	B1	B	1.65	M	0	0	Both Uninfected	3.14286	0.428571	0.713724	B	Win
2	B2	B	1.62	F	3	1	One Infected	3.5	0.75	1.0472	B	Win
3	B3	B	2.09	F	0	0	One Infected	2.66667	0	0	W	Loss
4	B4	B	1.97	F	0	0	Both Uninfected	2	0	0	W	Loss
5	B5	B	1.81	F	0	0	One Infected	1.4	0.5	0.785398	D	Draw
6	B6	B	1.83	M	0	0	One Infected	3.16667	0.125	0.361367	B	Win
7	B7	B	1.51	M	0	0	One Infected	3	0.111111	0.339837	W	Loss
8	B8	B	1.8	F	3	1	One Infected	2	0	0	W	Loss
9	B9	B	1.57	F	2	1	One Infected	2.75	0.6	0.886077	W	Loss
10	B10	B	1.39	M	0	0	Both Uninfected	2.9	0	0	B	Win
11	B11	B	1.68	M	0	0	Both Uninfected	2.625	0.444444	0.729728	W	Loss
12	B12	B	1.92	F	3	1	Both Infected	2.55556	0.142857	0.387597	B	Win
13	B13	B	1.58	M	0	0	Both Uninfected	1.85714	0	0	W	Loss
14	B14	B	1.46	M	0	0	Both Uninfected	4.66667	0.5	0.785398	W	Loss
15	B15	B	2.1	F	1	1	One Infected	3.11111	0.272727	0.549467	B	Win
16	B16	B	1.6	M	0	0	Both Uninfected	2.8	0.727273	1.02133	B	Win
17	B17	B	1.36	M	0	0	Both Uninfected	2.63636	0	0	W	Loss
18	B18	B	1.34	M	2	1	One Infected	2.22222	0.375	0.659058	B	Win
19	B19	B	1.84	M	0	0	Both Uninfected	1.81818	0	0	B	Win
20	B20	B	1.8	M	0	0	Both Uninfected	1	0.333333	0.61548	D	Draw
21	B21	B	1.52	M	0	0	Both Uninfected	3.25	0.142857	0.387597	D	Draw
22	B22	B	1.78	M	1	1	Both Infected	1.16667	0.142857	0.387597	D	Draw
23	B23	B	2	F	0	0	One Infected	2.27273	0.571429	0.857072	B	Win
24	B24	B	1.88	M	3	1	One Infected	2.33333	0.3	0.57964	W	Loss
25	B25	B	1.74	M	0	0	Both Uninfected	1.57143	0.625	0.911738	W	Loss
26	B26	B	1.53	M	3	1	Both Infected	2.57143	0.285714	0.563943	W	Loss
27	B27	B	1.43	M	2	1	Both Infected	2.71429	0.285714	0.563943	B	Win
28	B28	B	1.61	F	0	0	Both Uninfected	3.3	0.5	0.785398	W	Loss
29	B29	B	1.56	M	0	0	Both Uninfected	2.75	0	0	B	Win
30	B30	B	1.67	M	2	1	One Infected	1.28571	0.444444	0.729728	B	Win
31	B31	B	1.79	M	3	1	One Infected	3	0.555556	0.841069	B	Win
32	B32	B	1.75	F	3	1	One Infected	2.5	0.5	0.785398	B	Win
33	B33	B	1.94	M	0	0	One Infected	3.33333	0.111111	0.339837	B	Win
34	B34	B	1.57	M	3	1	One Infected	1.66667	0.285714	0.563943	B	Win
35	B35	B	1.72	M	1	1	Both Infected	1	0.5	0.785398	D	Draw
36	B36	B	1.85	F	0	0	Both Uninfected	2.11111	0.428571	0.713724	B	Win
37	B37	B	1.96	F	2	1	Both Infected	1.66667	0	0	B	Win
38	B38	B	1.71	F	0	0	One Infected	2.16667	0	0	B	Win
39	B39	B	1.66	F	3	1	One Infected	1.85714	0.25	0.523599	W	Loss
40	B40	B	1.88	F	0	0	Both Uninfected	2.625	0.142857	0.387597	B	Win
41	B41	B	1.8	F	2	1	Both Infected	1.88889	0.222222	0.490883	W	Loss
42	B42	B	1.96	F	3	1	Both Infected	2	0.1	0.321751	D	Draw
43	B43	B	1.91	F	0	0	Both Uninfected	2.75	0	0	B	Win
44	B44	B	1.85	F	2	1	One Infected	1	0.545455	0.830916	W	Loss
45	B45	B	1.49	M	0	0	One Infected	3.42857	0	0	W	Loss
46	B46	B	1.68	M	3	1	Both Infected	3.22222	0.555556	0.841069	W	Loss
47	B47	B	1.52	M	1	1	One Infected	2.14286	0.285714	0.563943	W	Loss
48	B48	B	1.81	F	2	1	One Infected	2.375	0.125	0.361367	W	Loss
49	B49	B	1.42	M	1	1	One Infected	2.14286	0.111111	0.339837	D	Draw
50	B50	B	1.62	M	0	0	One Infected	3	0.7	0.991157	W	Loss
51	B51	B	2.01	F	0	0	Both Uninfected	3.55556	0.444444	0.729728	W	Loss
52	B52	B	1.84	F	0	0	Both Uninfected	2.5	0.545455	0.830916	W	Loss
53	B53	B	1.97	F	0	0	Both Uninfected	2	0.625	0.911738	W	Loss
54	B54	B	1.66	M	3	1	One Infected	2.3	0.666667	0.955317	B	Win
55	B55	B	1.65	F	0	0	Both Uninfected	2.36364	0.333333	0.61548	B	Win
56	B56	B	1.49	M	0	0	One Infected	2.77778	0	0	B	Win
57	B57	B	1.58	F	0	0	One Infected	2.5	0	0	B	Win
58	B58	B	2.12	F	0	0	Both Uninfected	2.125	0	0	W	Loss
59	B59	B	1.98	F	3	1	Both Infected	1	0.4	0.684719	B	Win
60	B60	B	1.92	F	0	0	Both Uninfected	3.28571	0.333333	0.61548	W	Loss
61	B61	B	1.66	M	0	0	Both Uninfected	3.14286	0.5	0.785398	W	Loss
62	B62	B	1.49	M	3	1	One Infected	3.27273	0.181818	0.440511	W	Loss
63	B63	B	1.84	F	2	1	Both Infected	1.42857	0.142857	0.387597	B	Win
64	B64	B	1.61	M	1	1	One Infected	1.66667	0.166667	0.420534	B	Win
65	B65	B	1.93	F	3	1	Both Infected	2.5	0.5	0.785398	B	Win
66	B66	B	1.7	F	0	0	Both Uninfected	1.8	0.6	0.886077	B	Win
67	B67	B	1.93	F	3	1	One Infected	3.14286	0	0	W	Loss
68	B68	B	1.82	M	0	0	Both Uninfected	2.28571	0.285714	0.563943	D	Draw
69	B69	B	1.87	M	0	0	Both Uninfected	1.33333	0.111111	0.339837	W	Loss
70	B70	B	1.69	F	2	1	One Infected	1.375	0.125	0.361367	W	Loss
71	B71	B	1.95	F	3	1	One Infected	1.63636	0.0909091	0.306277	W	Loss
72	B72	B	1.51	M	1	1	Both Infected	2.09091	0.181818	0.440511	W	Loss
73	B73	B	1.9	F	0	0	One Infected	1.6	0	0	W	Loss
74	B74	B	1.67	F	3	1	One Infected	2.45455	0	0	W	Loss
75	B75	B	1.64	F	0	0	One Infected	1	0.5	0.785398	B	Win
76	B76	B	1.84	M	2	1	Both Infected	2.625	0.428571	0.713724	B	Win
77	B77	B	2.07	F	2	1	Both Infected	2.625	0.25	0.523599	D	Draw
78	B78	B	1.61	M	0	0	One Infected	2.85714	0.142857	0.387597	W	Loss
79	B79	B	1.71	F	0	0	Both Uninfected	2.125	0.25	0.523599	W	Loss
81	B81	B	1.5	F	2	1	One Infected	1.8	0.3	0.57964	D	Draw
82	B82	B	1.36	M	2	1	Both Infected	2.5	0.4	0.684719	D	Draw
83	B83	B	1.71	F	2	1	Both Infected	1.45455	0	0	D	Draw
84	B84	B	1.7	F	2	1	One Infected	3.125	0.75	1.0472	B	Win
85	B85	B	1.74	F	3	1	Both Infected	1.33333	0.111111	0.339837	D	Draw
87	B87	B	1.5	M	3	1	One Infected	1.375	0	0	W	Loss
88	B88	B	1.57	F	0	0	One Infected	2.88889	0.444444	0.729728	D	Draw
89	B89	B	1.99	F	0	0	Both Uninfected	1.14286	0	0	D	Draw
90	B90	B	1.27	M	1	1	One Infected	2.22222	0.111111	0.339837	W	Loss
91	B91	B	1.45	M	1	1	Both Infected	1.42857	0.142857	0.387597	B	Win
92	B92	B	1.63	F	2	1	One Infected	3.25	0.125	0.361367	W	Loss
93	B93	B	1.57	M	0	0	One Infected	1.75	0	0	D	Draw
94	B94	B	1.72	F	0	0	One Infected	2.22222	0	0	W	Loss
95	B95	B	2.13	F	0	0	One Infected	1.25	0.222222	0.490883	B	Win
96	B96	B	1.86	M	3	1	Both Infected	1	0	0	D	Draw
97	B97	B	1.36	F	2	1	Both Infected	1.55556	0.333333	0.61548	B	Win
98	B98	B	1.62	M	0	0	One Infected	1.33333	0.111111	0.339837	B	Win
1	W1	W	1.65	M	0	0	Both Uninfected		0.285714	0.563943	B	Loss
2	W2	W	1.63	M	0	0	One Infected		0.125	0.361367	B	Loss
3	W3	W	2.07	F	2	1	One Infected		0.142857	0.387597	W	Win
4	W4	W	1.96	F	0	0	Both Uninfected		0	0	W	Win
5	W5	W	1.81	F	1	1	One Infected		0	0	D	Draw
6	W6	W	1.85	F	3	1	One Infected		0.75	1.0472	B	Loss
7	W7	W	1.52	F	3	1	One Infected		0.222222	0.490883	W	Win
8	W8	W	1.79	F	0	0	One Infected		0.375	0.659058	W	Win
9	W9	W	1.59	M	0	0	One Infected		0.3	0.57964	W	Win
10	W10	W	1.37	M	0	0	Both Uninfected		0.625	0.911738	B	Loss
11	W11	W	1.7	F	0	0	Both Uninfected		0.222222	0.490883	W	Win
12	W12	W	1.91	M	2	1	Both Infected		0.714286	1.00685	B	Loss
13	W13	W	1.57	F	0	0	Both Uninfected		0.833333	1.15026	W	Win
14	W14	W	1.46	M	0	0	Both Uninfected		0.2	0.463648	W	Win
15	W15	W	2.1	F	0	0	One Infected		0.454545	0.739881	B	Loss
16	W16	W	1.61	M	0	0	Both Uninfected		0.181818	0.440511	B	Loss
17	W17	W	1.34	M	0	0	Both Uninfected		0	0	W	Win
18	W18	W	1.34	M	0	0	One Infected		0.375	0.659058	B	Loss
19	W19	W	1.86	F	0	0	Both Uninfected		0	0	B	Loss
20	W20	W	1.78	M	0	0	Both Uninfected		0.555556	0.841069	D	Draw
21	W21	W	1.54	M	0	0	Both Uninfected		0.857143	1.1832	D	Draw
22	W22	W	1.79	F	3	1	Both Infected		0.428571	0.713724	D	Draw
23	W23	W	2.05	F	1	1	One Infected		0.285714	0.563943	B	Loss
24	W24	W	1.88	F	0	0	One Infected		0.5	0.785398	W	Win
25	W25	W	1.76	F	0	0	Both Uninfected		0.375	0.659058	W	Win
26	W26	W	1.49	M	1	1	Both Infected		0	0	W	Win
27	W27	W	1.43	M	3	1	Both Infected		0.142857	0.387597	B	Loss
28	W28	W	1.58	M	0	0	Both Uninfected		0.333333	0.61548	W	Win
29	W29	W	1.58	M	0	0	Both Uninfected		0	0	B	Loss
30	W30	W	1.62	M	0	0	One Infected		0.333333	0.61548	B	Loss
31	W31	W	1.83	M	0	0	One Infected		0.111111	0.339837	B	Loss
32	W32	W	1.73	F	0	0	One Infected		0.375	0.659058	B	Loss
33	W33	W	1.89	F	3	1	One Infected		0.555556	0.841069	B	Loss
34	W34	W	1.54	M	0	0	One Infected		0.285714	0.563943	B	Loss
35	W35	W	1.7	M	2	1	Both Infected		0.125	0.361367	D	Draw
36	W36	W	1.85	F	0	0	Both Uninfected		0.571429	0.857072	B	Loss
37	W37	W	1.99	F	3	1	Both Infected		0.777778	1.07991	B	Loss
38	W38	W	1.73	F	3	1	One Infected		0.571429	0.857072	B	Loss
39	W39	W	1.7	F	0	0	One Infected		0.5	0.785398	W	Win
40	W40	W	1.87	F	0	0	Both Uninfected		0.142857	0.387597	B	Loss
41	W41	W	1.8	F	2	1	Both Infected		0.777778	1.07991	W	Win
42	W42	W	1.95	F	3	1	Both Infected		0.3	0.57964	D	Draw
43	W43	W	1.93	F	0	0	Both Uninfected		0.714286	1.00685	B	Loss
44	W44	W	1.86	F	0	0	One Infected		0.0909091	0.306277	W	Win
45	W45	W	1.45	F	2	1	One Infected		0.375	0.659058	W	Win
46	W46	W	1.71	M	2	1	Both Infected		0	0	W	Win
47	W47	W	1.54	F	0	0	One Infected		0.571429	0.857072	W	Win
48	W48	W	1.76	M	0	0	One Infected		0.25	0.523599	W	Win
49	W49	W	1.44	M	0	0	One Infected		0.777778	1.07991	D	Draw
50	W50	W	1.58	M	2	1	One Infected		0.2	0.463648	W	Win
51	W51	W	2.05	F	0	0	Both Uninfected		0.111111	0.339837	W	Win
52	W52	W	1.88	F	0	0	Both Uninfected		0.272727	0.549467	W	Win
53	W53	W	1.98	F	0	0	Both Uninfected		0.125	0.361367	W	Win
54	W54	W	1.62	M	0	0	One Infected		0	0	B	Loss
55	W55	W	1.64	F	0	0	Both Uninfected		0.166667	0.420534	B	Loss
56	W56	W	1.47	M	1	1	One Infected		0.714286	1.00685	B	Loss
57	W57	W	1.63	F	3	1	One Infected		0.666667	0.955317	B	Loss
58	W58	W	2.09	F	0	0	Both Uninfected		0.625	0.911738	W	Win
59	W59	W	1.99	F	2	1	Both Infected		0.3	0.57964	B	Loss
60	W60	W	1.85	F	0	0	Both Uninfected		0.222222	0.490883	W	Win
61	W61	W	1.69	M	0	0	Both Uninfected		0.125	0.361367	W	Win
62	W62	W	1.47	M	0	0	One Infected		0.727273	1.02133	W	Win
63	W63	W	1.83	F	3	1	Both Infected		0	0	B	Loss
64	W64	W	1.56	M	0	0	One Infected		0	0	B	Loss
65	W65	W	1.91	F	1	1	Both Infected		0.25	0.523599	B	Loss
66	W66	W	1.68	F	0	0	Both Uninfected		0.3	0.57964	B	Loss
67	W67	W	1.93	F	0	0	One Infected		0.714286	1.00685	W	Win
68	W68	W	1.82	M	0	0	Both Uninfected		0.285714	0.563943	D	Draw
69	W69	W	1.88	F	0	0	Both Uninfected		0.444444	0.729728	W	Win
70	W70	W	1.73	M	0	0	One Infected		0.375	0.659058	W	Win
71	W71	W	1.91	F	0	0	One Infected		0.636364	0.923511	W	Win
72	W72	W	1.49	F	2	1	Both Infected		0.545455	0.830916	W	Win
73	W73	W	1.94	F	3	1	One Infected		0.3	0.57964	W	Win
74	W74	W	1.63	M	0	0	One Infected		0.818182	1.13029	W	Win
75	W75	W	1.6	M	1	1	One Infected		0	0	B	Loss
76	W76	W	1.79	F	1	1	Both Infected		0.285714	0.563943	B	Loss
77	W77	W	2.01	F	1	1	Both Infected		0.25	0.523599	D	Draw
78	W78	W	1.6	F	2	1	One Infected		0.428571	0.713724	W	Win
79	W79	W	1.71	M	0	0	Both Uninfected		0.375	0.659058	W	Win
81	W81	W	1.49	F	0	0	One Infected		0.3	0.57964	D	Draw
82	W82	W	1.37	F	2	1	Both Infected		0.4	0.684719	D	Draw
83	W83	W	1.76	M	3	1	Both Infected		0	0	D	Draw
84	W84	W	1.7	F	0	0	One Infected		0	0	B	Loss
85	W85	W	1.74	F	2	1	Both Infected		0.111111	0.339837	D	Draw
87	W87	W	1.45	M	0	0	One Infected		0.125	0.361367	W	Win
88	W88	W	1.53	M	2	1	One Infected		0.444444	0.729728	D	Draw
89	W89	W	1.97	F	0	0	Both Uninfected		0	0	D	Draw
90	W90	W	1.24	M	0	0	One Infected		0.333333	0.61548	W	Win
91	W91	W	1.42	M	1	1	Both Infected		0	0	B	Loss
92	W92	W	1.66	F	0	0	One Infected		0.75	1.0472	W	Win
93	W93	W	1.55	M	1	1	One Infected		0	0	D	Draw
94	W94	W	1.7	F	3	1	One Infected		0.222222	0.490883	W	Win
95	W95	W	2.13	F	1	1	One Infected		0.111111	0.339837	B	Loss
96	W96	W	1.89	F	2	1	Both Infected		0	0	D	Draw
97	W97	W	1.33	F	1	1	Both Infected		0	0	B	Loss
98	W98	W	1.66	F	3	1	One Infected		0	0	B	Loss
